# Supplementary material for: Risk factor-based optimal endoscopic surveillance intervals after endoscopic submucosal dissection for gastric adenoma
Source: PubMed Central journal article supplement (PMC8560818; doi:10.1038/s41598-021-00969-1), 2021-11-01
Supplement: 41598_2021_969_MOESM1_ESM.pdf [file 41598_2021_969_MOESM1_ESM.pdf]

**Risk factor-based optimal endoscopic surveillance intervals after endoscopic submucosal dissection for gastric adenoma**

Choong-Kyun Noh, Eunyoung Lee, Gil Ho Lee, Sun Gyo Lim, Kee Myung Lee, Jin Roh, Young Bae Kim, Bumhee Park, and Sung Jae Shin

## Supplementary Figure

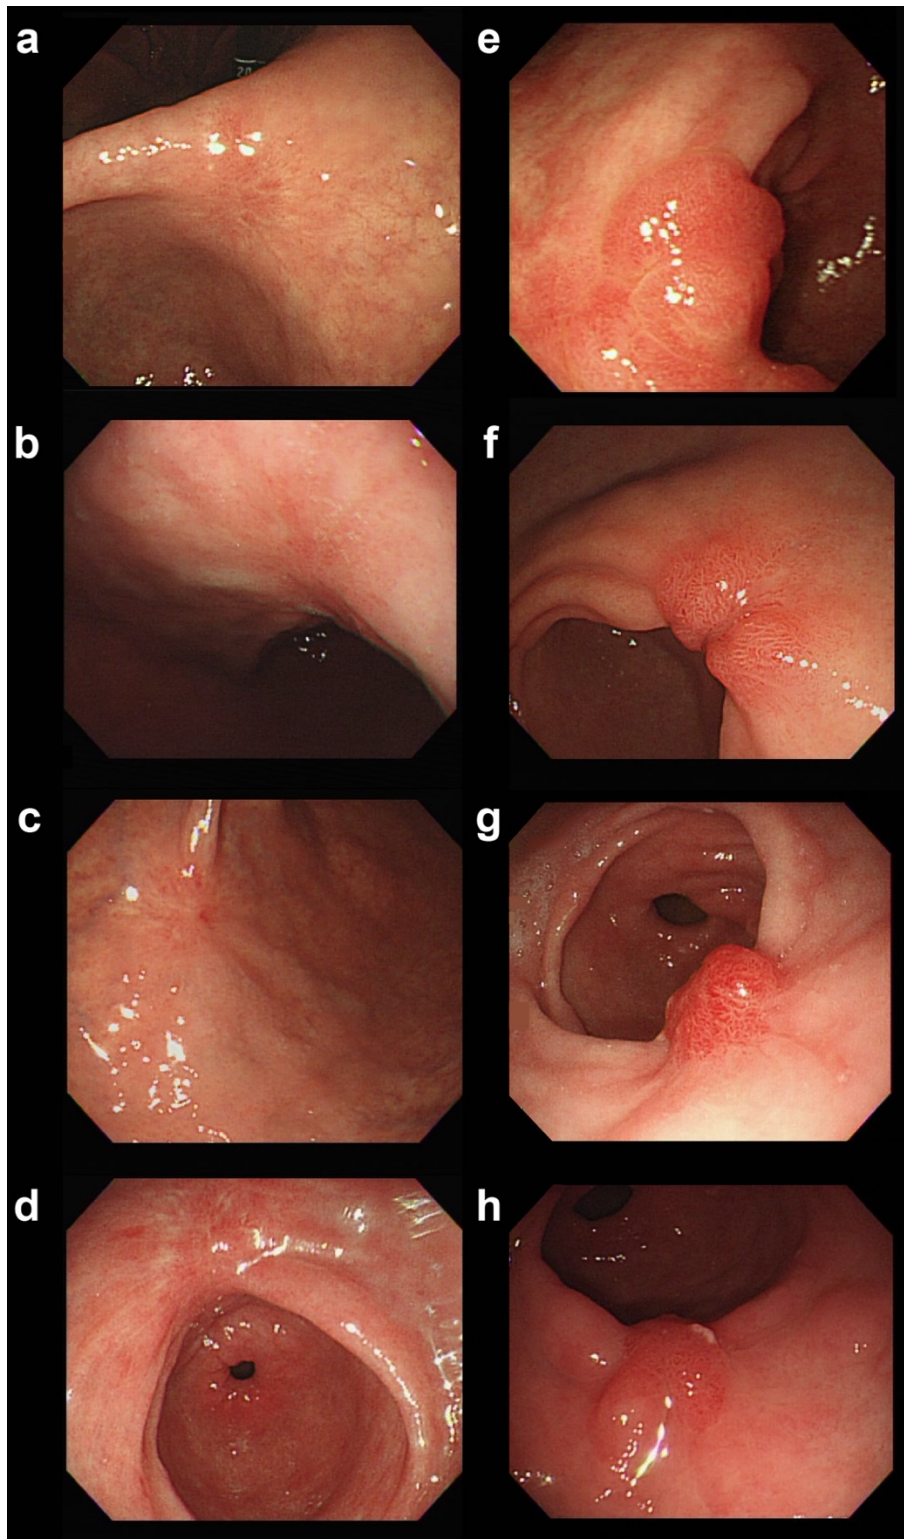

**Supplement Figure 1. Various morphology of scar formation after endoscopic submucosal dissection (ESD).** Clean scar was shown as flat, smooth, and whitish or reddish colored scarring change at the post-ESD scar site (a, b, c, and d). Protruded scar was characterized with polypoid or nodular shaped protuberant scarring formation located in the post-ESD site, which was accompanied with or without converging folds (e, f, g, and h).

**Supplementary Table 1. Hazard ratios (95% confidence intervals) from univariate and multivariable Cox regression models and risk factors identified via Cox regression performed using a stepwise selection method for recurrence after endoscopic submucosal dissection with curative resection.**

| Parameter                  |                  | Univariate analysis |        |        | Multivariable analysis |      |        | Stepwise selection |         |      |        |       |         |
|----------------------------|------------------|---------------------|--------|--------|------------------------|------|--------|--------------------|---------|------|--------|-------|---------|
|                            |                  | HR                  | 95% CI |        | P-value                | HR   | 95% CI |                    | P-value | HR   | 95% CI |       | P-value |
| Sex                        | Male             | 2.89                | 1.232  | 6.798  | 0.015                  | 2.17 | 0.955  | 4.954              | 0.064   | 2.60 | 1.096  | 6.172 | 0.030   |
|                            | Female           | ref.                |        |        |                        | ref. |        |                    |         | ref. |        |       |         |
| Number of lesion           | Multiple         | 1.88                | 0.908  | 3.868  | 0.089                  | 1.52 | 0.704  | 3.288              | 0.286   |      |        |       |         |
|                            | Single           | ref.                |        |        |                        |      |        |                    |         |      |        |       |         |
| Atrophy gastritis          | Yes              | 2.98                | 1.178  | 7.523  | 0.021                  | 3.85 | 0.974  | 15.175             | 0.055   |      |        |       |         |
|                            | No               |                     |        |        |                        | ref. |        |                    |         |      |        |       |         |
| <i>H. pylori</i> infection | Yes <sup>a</sup> | 0.81                | 0.432  | 1.535  | 0.525                  | 1.12 | 0.583  | 2.145              | 0.737   |      |        |       |         |
|                            | No               | ref.                |        |        |                        | ref. |        |                    |         |      |        |       |         |
| Location                   | Upper third      | ref.                |        |        |                        | ref. |        |                    |         |      |        |       |         |
|                            | Middle third     | 1.49                | 0.197  | 11.201 | 0.701                  | 1.30 | 0.16   | 10.489             | 0.809   |      |        |       |         |
|                            | Lower third      | 1.81                | 0.247  | 13.241 | 0.560                  | 1.42 | 0.179  | 11.298             | 0.738   |      |        |       |         |
| Gross morphology type      | Depressed        | 0                   | 0      | .      | 0.984                  | 0    | 0      | .                  | 0.988   |      |        |       |         |
|                            | Elevated/flat    | ref.                |        |        |                        | ref. |        |                    |         |      |        |       |         |
| Ulceration                 | Yes              | 0.84                | 0.116  | 6.087  | 0.863                  | 0.68 | 0.078  | 5.984              | 0.731   |      |        |       |         |

|                                  |                          |      |       |       |        |       |       |       |        |      |       |       |        |
|----------------------------------|--------------------------|------|-------|-------|--------|-------|-------|-------|--------|------|-------|-------|--------|
|                                  | No                       | ref. |       |       |        | ref.  |       |       |        |      |       |       |        |
| Intestinal metaplasia            | Yes                      | 1.95 | 0.829 | 4.585 | 0.126  | 0.58  | 0.157 | 2.129 | 0.409  |      |       |       |        |
|                                  | No                       | ref. |       |       |        | ref.  |       |       |        |      |       |       |        |
| Fibrosis during ESD              | Yes                      | 0.45 | 0.162 | 1.257 | 0.128  | 0.62  | 0.211 | 1.848 | 0.394  |      |       |       |        |
|                                  | No                       | ref. |       |       |        | ref.  |       |       |        |      |       |       |        |
| Discrepancy                      | Upgrade                  | 0.82 | 0.254 | 2.629 | 0.735  | 0.60  | 0.203 | 1.776 | 0.357  |      |       |       |        |
|                                  | Downgrade and concordant | ref. |       |       |        | ref.  |       |       |        |      |       |       |        |
| Scar morphology at 1st follow-up | Protruded                | 3.48 | 1.779 | 6.824 | 0.0003 | 2.69  | 1.30  | 5.566 | 0.008  | 3.18 | 1.601 | 6.300 | <0.001 |
|                                  | Flat                     | ref. |       |       |        | ref.  |       |       |        | ref. |       |       |        |
| Age                              |                          | 1.05 | 1.019 | 1.082 | 0.001  | 1.059 | 1.03  | 1.093 | <0.001 | 1.05 | 1.023 | 1.086 | <0.001 |
| Lesion diameter, mm              | ≤10                      | ref. |       |       |        |       |       |       |        | ref. |       |       |        |
|                                  | 10–20                    | 1.12 | 0.487 | 2.586 | 0.786  | 1.039 | 0.44  | 2.442 | 0.930  |      |       |       |        |
|                                  | 20–30                    | 1.28 | 0.503 | 3.276 | 0.601  | 1.17  | 0.432 | 3.139 | 0.763  |      |       |       |        |
|                                  | >30                      | 1.93 | 0.612 | 6.097 | 0.261  | 1.40  | 0.407 | 4.825 | 0.593  |      |       |       |        |
| Specimen area, mm <sup>2</sup>   |                          | 1.17 | 0.988 | 1.395 | 0.068  | 1.27  | 1.041 | 1.552 | 0.019  |      |       |       |        |
| Total procedure time, min        |                          | 0.99 | 0.983 | 1.004 | 0.225  | 0.99  | 0.98  | 1.003 | 0.169  |      |       |       |        |

HR, hazard ratio, CI, confidence interval, ref, reference, ESD, endoscopic submucosal dissection, *H. pylori*, *Helicobacter pylori*

<sup>a</sup>Included both current and previous infection (including eradicated status)
